1 **Spider web DNA: a new spin on noninvasive genetics of predator and prey.**

2

3 Charles C. Y. Xu<sup>1</sup>, Ivy J. Yen<sup>1</sup>, Dean Bowman<sup>2</sup>, Cameron R. Turner<sup>1</sup>

4 1. Department of Biological Sciences, University of Notre Dame, Notre Dame, IN 46556, USA

5 2. Potawatomi Zoo, South Bend, IN 46615, USA

6

7 Keywords: Biomonitoring; black widow spider; environmental DNA; eDNA; noninvasive

8 genetics; spider web

9

10 \*Correspondence: Charles C. Y. Xu, Department of Biological Sciences, University of Notre

11 Dame, Notre Dame, IN 46556, USA; Fax: 574-631-7413; E-mail: charles.cong.xu@gmail.com

12

13 Running title: Detecting DNA in spider webs

14

15 **Abstract**

16 Noninvasive genetic approaches enable biomonitoring without the need to directly observe or

17 disturb target organisms. Environmental DNA (eDNA) methods have recently extended this

18 approach by assaying genetic material within bulk environmental samples without *a priori*

19 knowledge about the presence of target biological material. This paper describes a novel and

20 promising source of noninvasive spider DNA and insect eDNA from spider webs. Using black

21 widow spiders (*Latrodectus* spp.) fed with house crickets (*Acheta domesticus*), we successfully

22 extracted and amplified mitochondrial DNA sequences of both spider and prey from spider web.

23 Detectability of spider DNA did not differ between assays with amplicon sizes from 135 to 497

24 base pairs. Spider DNA and prey eDNA remained detectable at least 88 days after living  
25 organisms were no longer present on the web. Spider web DNA may be an important tool in  
26 conservation research, pest management, biogeography studies, and biodiversity assessments.

27

## 28 **Introduction**

29 As dominant predators of arthropod communities in natural and agricultural ecosystems, spiders  
30 are important ecological indicators that reflect habitat quality and change across trophic levels  
31 (Churchill 1997; Clausen 1986). Monitoring the species diversity and abundance of spider  
32 assemblages facilitates natural resource management (Pearce and Venier 2006). Spiders are  
33 enormously diverse (~ 44,000 described species; Platnick 2013) and difficult to identify.

34 Morphological identification of spiders relies primarily on differences in copulatory organs  
35 (Huber 2004) and many complications can prevent identification such as the inability to identify  
36 juveniles, extreme sexual dimorphism, size differences between life stages, and genital  
37 polymorphisms (Barrett and Hebert 2005; Brennan *et al.* 2004; Huber and Gonzalez 2001). Other  
38 major issues include the ever decreasing availability of expertise necessary for traditional  
39 taxonomy as well as the significant training required to learn taxonomic skills (Hopkins and  
40 Freckleton 2002). In the face of such challenges to morphological taxonomy, genetic  
41 identification methods are growing in popularity because of decreasing costs and ease of use.

42 DNA barcoding, the use of a short and standardized fragment of DNA to identify organisms, has  
43 gained significant traction within the last decade (Jinbo *et al.* 2011). In particular, the use of DNA  
44 barcodes for species identity and systematics of spiders has proven successful in multiple studies  
45 (Astrin *et al.* 2006; Barrett and Hebert 2005; Robinson *et al.* 2009). The most commonly used  
46 genetic marker is the cytochrome oxidase subunit I (COI) mitochondrial gene because of its

47 designation as the standard DNA barcode (Hebert *et al.* 2003). Mitochondrial markers are also  
48 ideal for detecting low quantity and quality DNA from environmental or gut samples because  
49 each cell contains hundreds to thousands of mitochondrial genomes (Hoy 1994) and there is a  
50 positive correlation between gene copy number and detection success (Agustí *et al.* 2003b; Chen  
51 *et al.* 2000).

52  
53 Spiders have a great diversity of life histories and various sampling methods are employed in  
54 capturing them including vacuum sampling, sweep netting, pitfall traps, and visual searches.  
55 Experiments testing the efficacy of traditional spider sampling methods show high variability  
56 between methods as well as inconsistency across spatial and temporal scales (Churchill and  
57 Arthur 1999; Green 1999; Merrett and Snazell 1983). Sampling duration is also an important  
58 factor as short-term sampling has been found to reduce the number of recorded species by up to  
59 50% (Riecken 1999). In this paper, we propose a new biomonitoring tool that would complement  
60 existing methods: DNA from spider web. While spider web has been found to effectively collect  
61 pollen, fungal spores and agrochemical sprays (Eggs and Sanders 2013; Samu *et al.* 1992), no  
62 study, to our knowledge, has assessed spider web as a potential source of genetic material. We  
63 hypothesized that spider web could simultaneously provide a noninvasive genetic sample (spider  
64 DNA) and an environmental DNA sample (prey DNA). Noninvasive genetic sampling uses  
65 extraorganismal material like feces, hair, and feathers from individual organisms for genetic  
66 analysis without the need to contact target organisms (Beja-Pereira *et al.* 2009). Environmental  
67 DNA (eDNA) sampling uses genetic material from environmental mixtures like water or soil  
68 without isolating target organisms or their parts (Turner *et al.* 2014).

69

70 Although noninvasive genetic sampling is most common for vertebrates, it has been successfully  
71 applied to arthropod exuviae and frass (Feinstein 2004; Petersen *et al.* 2006). Webs are an  
72 abundant and easily collected spider secretion that may provide spider DNA. Spider webs may  
73 also contain eDNA from captured prey and other local organisms, functioning as natural  
74 biodiversity samplers. This idea parallels recent molecular studies using mosquitos, ticks, leeches,  
75 and carrion flies to sample local animal biodiversity (Calvignac-Spencer *et al.* 2013, Garipey *et al.*  
76 2012, Schnell *et al.* 2012, Townzen *et al.* 2008). Previous studies have successfully used  
77 mitochondrial DNA markers to detect spider prey from gut contents, but this requires physically  
78 capturing and killing spiders (Agustí *et al.* 2003a; Sheppard *et al.* 2005). Furthermore, traditional  
79 taxonomic identification of spider prey items is time-consuming, subject to human error, and  
80 accurate only to the order level (Salomon 2011). Spider webs may provide a unique noninvasive  
81 opportunity to study arthropod communities without the need to directly observe spider or insect.

82

83 Here, we tested the feasibility of extracting, amplifying and sequencing DNA of black widow  
84 spiders, *Latrodectus* spp. (Araneae: Theridiidae), and their prey, the house cricket *Acheta*  
85 *domesticus* (Orthoptera: Gryllidae), from black widow spider webs. Because extraorganismal  
86 DNA in spider webs is exposed to environmental degradation and may exist in short fragments,  
87 we used nested primer sets to test the effect of amplicon size on detection probability.

88

## 89 **Materials and methods**

### 90 *Web collection*

91 The black widow spider exhibit at the Potawatomi Zoo in South Bend, Indiana was inhabited by a  
92 single female western black widow spider (*Latrodectus hesperus*) before its death on November

93 19, 2011. The spider was fed 2 medium sized house crickets (*A. domesticus*), on a weekly basis  
94 by zookeepers. The exhibit measured 40 cm by 40 cm by 40 cm and contained a few twigs, a  
95 small piece of wood, and wood shavings lining its floor. 88 days after the death of the spider, a  
96 web sample was collected from the exhibit on February 15, 2012, which will be referred to as  
97 “Lhes\_zoo”. The duration of inhabitation within the exhibit prior to the sample collection date is  
98 unknown. Three individual enclosures measuring 35 cm by 30 cm by 35 cm were constructed  
99 with plywood and acrylic sheeting. All enclosures were decontaminated with 10% bleach and  
100 installed at the Potawatomi Zoo in South Bend, Indiana.

101  
102 Three female southern black widow spiders (*Latrodectus mactans*) were purchased from  
103 Tarantula Spiders (<http://tarantulaspiders.com/>). The spiders were hatched from egg sacs  
104 collected in Marion County, Florida, USA and raised on 2-3 housefly maggots (*Musca domestica*)  
105 twice per week before delivery to the Potawatomi Zoo. A single live *L. mactans* and a  
106 decontaminated branch for web building were placed into each enclosure on April 26, 2012  
107 (Figure 1). Each *L. mactans* was immediately fed two medium-sized crickets by placing them  
108 onto web. Web samples were collected from each enclosure 11 days later on May 7, 2012, which  
109 will be referred to as “Lmac\_1”, “Lmac\_2”, and “Lmac\_3”. All web samples were collected by  
110 twisting single-use, sterile plastic applicators to spool silk strands. No organism body parts or  
111 exuviae were visible in any web samples but cricket parts and spider feces were clearly evident  
112 on the bottom of the enclosures. Applicator tips were snipped into 1.5 mL microcentrifuge tubes  
113 using 10% bleach decontaminated scissors before storing at -20°C.

114

115 *DNA extraction*

116 DNA extractions from web samples were conducted using a modified extraction protocol for shed  
117 reptile skins (Fetzner 1999). One negative control containing no web was also extracted. 800  $\mu$ L  
118 of cell lysis buffer (10 mM Tris, 10 mM EDTA, 2% sodium dodecyl sulfate [SDS], pH 8.0) and  
119 8 $\mu$ L of proteinase K (20 mg/L) were added to 1.5 mL microcentrifuge tubes containing web  
120 samples followed by 10-20 inversions and incubation at 55°C for 4 hours. Upon reaching room  
121 temperature, 4  $\mu$ L of RNase A (10 mg/mL) were added to each sample followed by 20 inversions.  
122 Samples were incubated at 37°C for 15 min and then brought back to room temperature. 300  $\mu$ L  
123 of protein precipitation solution (7.5 M ammonium acetate) were added to each sample and  
124 vortexed for 20 seconds followed by incubation on ice for 15 min. Samples were then centrifuged  
125 at 16,873 rcf for 3 min. Supernatants were transferred to new 2 mL microcentrifuge tubes  
126 containing 750  $\mu$ L of ice cold isopropanol and inverted 50 times before centrifugation at 14,000  
127 rpm for 2 min. All supernatants were drained and 750  $\mu$ L of 70% ethanol was added to each  
128 sample followed by centrifugation at 14,000 rpm for 3 min. All liquids were removed and  
129 samples were air dried. DNA pellets were rehydrated using 100  $\mu$ L of low TE buffer (10 mM Tris,  
130 0.1 mM EDTA).

131

### 132 *Primer design*

133 To detect *Latrodectus* DNA, we designed four nested primer sets based on an alignment of  
134 *Latrodectus* COI DNA barcoding sequences obtained from the National Center for Biotechnology  
135 Information (NCBI) GenBank database. All four assays included the same forward primer but  
136 different reverse primers, producing amplicons of 135 bp, 257 bp, 311 bp, and 497 bp  
137 respectively (Table 1). To detect prey DNA, we designed a set of primers that specifically targets

138 the DNA barcoding region of the COI gene in *A. domesticus*, which produces an amplicon of 248  
139 bp (Table 1).

140

#### 141 *DNA amplification*

142 All DNA samples were amplified in polymerase chain reactions (PCR) of 20  $\mu$ L containing 13.28  
143  $\mu$ L of ddH<sub>2</sub>O, 2  $\mu$ L of 5 PRIME® 10x Taq Buffer advanced, 2  $\mu$ L of 5 PRIME® Magnesium  
144 Solution at 25 mM, 0.4  $\mu$ L of dNTP at 2.5 mM, 0.12  $\mu$ L of 5 PRIME® Taq DNA polymerase at 5  
145 U/ $\mu$ L, 0.6  $\mu$ L of forward and reverse primers at 10  $\mu$ M, and 1.0  $\mu$ L of DNA template using  
146 Eppendorf Mastercycler® pro thermocyclers. Cycling conditions were as follows: 94°C/5 min,  
147 55X (94°C/20 s, 54.4°C/35 s, 72° C/30 s), 72° C/7 m, 4° C/hold. Each *Latrodectus* spp. primer  
148 set was used to amplify all DNA samples with 10 technical replicates to measure detection  
149 probability for different amplicon sizes. All DNA samples were amplified with 2 technical  
150 replicates using the *A. domesticus* primer set. Negative control reactions to detect contamination  
151 were included in every batch. Gel electrophoresis was conducted using 5  $\mu$ L of PCR product  
152 mixed with 3  $\mu$ L of loading dye and 10  $\mu$ L of ddH<sub>2</sub>O. Multiple wells were loaded with 5  $\mu$ L of  
153 100 bp ladder (Promega) on each gel. Technical replicates showing amplicons of the expected  
154 size were pooled and purified using ExoSAP-IT (Affymetrix). Sanger sequencing using ABI  
155 BigDye chemistry (Life Technologies) was conducted on an ABI 3730xl 96-capillary sequencer  
156 by the University of Notre Dame Genomics Core Facility. Sequencing chromatograms were  
157 primer- and quality-trimmed in Sequencher (ver. 5.0; Gene Codes Corp.). BLASTn searches of  
158 the NCBI GenBank database (<http://www.ncbi.nlm.nih.gov>; Benson *et al.* 2012) were used for  
159 taxonomic identification of COI barcode sequences.

160

161 **Results**

162 All extraction and PCR negative controls produced no amplification. Using the nested primer sets,  
163 we successfully amplified 135 bp, 257 bp, 311 bp, and 497 bp of *Latrodectus* spp. COI from web  
164 DNA samples (Figure 2). With the exception of zero amplification for the 265 bp PCR assay  
165 from two samples, 2-10 technical replicates of each PCR assay successfully amplified from all  
166 samples. DNA sequences obtained from enclosure samples, “Lmac\_1”, “Lmac\_2”, and  
167 “Lmac\_3”, were confirmed by NCBI BLAST to be *L. mactans* and DNA from the zoo exhibit  
168 sample, “Lhes\_zoo”, was confirmed to be *L. hesperus*. Amplicon size had no effect on PCR  
169 success based on the number of successful PCR replicates (ANOVA,  $F = 1.941$ , d.f. = 3,  $P =$   
170 0.194). We also successfully amplified 248 bp of *Acheta domesticus* COI from eDNA samples.  
171 Both PCR duplicates from all four web samples were positive and all resulting DNA sequences  
172 were confirmed by NCBI BLAST to be *A. domesticus*. The zoo exhibit web sample, “Lhes\_zoo”,  
173 was collected 88 days after the death and removal of both spider and prey, demonstrating  
174 substantial persistence of web DNA. All DNA sequences generated in this study are provided in  
175 Table S1 (Supplementary Data).

176

177 **Discussion**

178 The present study represents, to our knowledge, the first demonstration of spider web as a source  
179 of noninvasive genetic material. Spider web is an ideal source of noninvasive genetic material for  
180 spiders because web can be found and collected without direct observation of target organisms.  
181 Unlike most spiders, which are small, mobile, and elusive, webs are relatively large, stationary,  
182 and usually clearly visible, making sample collection more efficient. Spider webs may also  
183 remain after the inhabitant moves or dies, which increases detection probability, especially for the



184 more elusive spider species. Webs can also exist in great abundance. For example, web coverage  
185 may reach up to more than 50% of land area in agricultural fields (Sunderland *et al.* 1986). Spider  
186 webs have already been utilized by citizen scientists to assess spider biodiversity through visual  
187 analysis of web structure (Gollan *et al.* 2010). It could be possible to implement similar citizen  
188 science initiatives to collect web samples for DNA analysis.

189  
190 We hypothesize that spider web DNA originates either from microscopic pieces of fecal matter,  
191 setae, and exuviae adhered to silk strands or directly from the silk gland exudate, which may  
192 contain cells and mitochondria shed from silk glands. Because black widow spiders are orb  
193 weavers that generate large three-dimensional cobwebs consisting of sheets dotted with glue  
194 droplets (Zevenbergen *et al.* 2008), they were ideal to use in this experiment. Certain black  
195 widow spiders like *L. mactans* and *L. hesperus* are common venomous pests so spider web DNA  
196 could be a particularly useful tool for pest surveillance (Lewitus 1935). Because webs are easier  
197 to find and collect than live spiders, spider web DNA could also help monitor low density  
198 populations and determine invasive fronts of invasive widow spiders such as the brown widow,  
199 *Latrodectus geometricus*, in southern California and the Australian redback, *Latrodectus hasseltii*,  
200 in New Zealand and Japan (Vetter *et al.* 2012; Vink *et al.* 2011). Besides pests and invasives,  
201 many spider species like the red katipo (*Latrodectus katipo*) are threatened or endangered and  
202 hundreds if not thousands more are listed as “Data Deficient” but are probably at risk of decline  
203 (Sirvid *et al.* 2012). Spider web DNA could be particularly useful in easily providing occurrence  
204 and genetic diversity data for these rare species of concern. As a noninvasive biomonitoring  
205 method, spider web DNA could be used for conservation and taxonomy without sacrificing  
206 organisms that are already threatened by human disturbance. The collection and genetic analysis

207 of spider webs could also serve spider biogeography studies, which require large-scale sampling  
208 across wide geographic ranges (Garb *et al.* 2004). Even silk from organisms that do not weave  
209 webs such as tarantulas and moth larvae may still yield viable DNA, but further experimentation  
210 is needed. This may be applicable towards molecular studies of trapdoor spiders, which construct  
211 burrows using silk but are extraordinarily difficult to capture for genetic sampling (Cooper *et al.*  
212 2011).

213  
214 Although the efficacy of spider web eDNA needs to be validated with samples from the field, this  
215 is the first demonstration that DNA of other insects can be extracted from spider webs. Spider  
216 predation can serve as a useful proxy to monitor local arthropod biodiversity. In some  
217 environments such as temperate forests, approximately 40% of arthropod biomass is annually  
218 consumed by spiders (Moulder and Reichle 1972). Although spider predation cannot be  
219 concluded from the mere presence of DNA on spider web, it does indicate the local proximity of  
220 those organisms. The ability to target particular species could be useful in monitoring low density  
221 populations of pest, invasive, or endangered insects. Future work using massively parallel  
222 sequencing on spider web eDNA could reveal entire assemblages of arthropods in a cost-effective  
223 manner, especially with the rapid advancement and decreasing costs of such technologies  
224 (Shokralla *et al.* 2012). Spider web eDNA may complement traditional assessment methods of  
225 local arthropod biodiversity and potentially reveal previously undiscovered biodiversity through  
226 improved sensitivity and sampling effort (Nielsen and Laurence 2000). Such information  
227 regarding species diversity is critically important in conservation planning and environmental  
228 impact assessments (Kremen *et al.* 1993, Rosenberg *et al.* 1986).

229

230 In conclusion, we provide the first demonstration that noninvasive DNA of spider and its prey  
231 can be extracted from spider web and be used to identify organisms to species. This method is  
232 low-cost, efficient, and does not require significant taxonomic expertise. Spider web DNA is a  
233 promising tool for the biomonitoring of spiders and other arthropods, especially if combined with  
234 the power of massively parallel sequencing.

235

### 236 **Author Contributions**

237 CCYX and CRT designed the research. CCYX, CRT, IJY, and DB performed the research.

238 CCYX and CRT wrote the paper with help from IJY and DB.

239

### 240 **Acknowledgements**

241 We thank Larry Richey for his help in constructing the enclosures and we are indebted to Scott

242 Camazine for sharing his photograph for Figure 1. We would also like to thank the Potawatomi

243 Zoo for their cooperation as well as all the members of the Lodge lab and especially Dr. David

244 Lodge for their support of this project.

245

### 246 **References**

247 Agustí N, Shayler SP, Harwood JD, Vaughan IP, Sunderland KD, Symondson WOC (2003a)

248 Collembola as alternative prey sustaining spiders in arable ecosystems: prey detection  
249 within predators using molecular markers. *Molecular Ecology*, **12**, 3467-3475.

250 Agustí N, Unruh TR, Welter SC (2003b) Detecting *Cacopsylla pyricola* (Hemiptera: Psyllidae) in

251 predator guts using COI mitochondrial markers. *Bulletin of Entomological Research*,

252 **93**,179-185.

- 253 Astrin JJ, Huber BA, Misof B, Klütsch CFC (2006) Molecular taxonomy in pholcid spiders  
254 (Pholcidae, Araneae): evaluation of species identification methods using CO1 and 16S  
255 rRNA. *Zoologica Scripta*, **35**, 441-457.
- 256 Barrett RDH and Hebert PDN (2005) Identifying spiders through DNA barcodes. *Canadian*  
257 *Journal of Zoology*, **83**, 481-491.
- 258 Beja-Pereira A, Oliveira R, Alves, PC, Schwartz MK, Luikart G (2009) Advancing ecological  
259 understandings through technological transformations in noninvasive genetics. *Molecular*  
260 *Ecology Resources*, **9**, 28-36.
- 261 Benson DA, Karsch-Mizrachi I, Clark K, Lipman DJ, Ostell J, Sayers EW (2012) GenBank.  
262 *Nucleic Acids Research*, **40**, D48–D53.
- 263 Brennan KEC, Moir ML, Majer JD (2004) Exhaustive sampling in a Southern Hemisphere global  
264 biodiversity hotspot: inventorying species richness and assessing endemism of the little  
265 known jarrah forest spiders. *Pacific Conservation Biology*, **10**, 241-260.
- 266 Calvignac-Spencer S, Merkel K, Kutzner N, Köhl H, Boesch C, Kappeler PM, Metzger S,  
267 Schubert G, Leendertz FH (2013) Carrion fly-derived DNA as a tool for comprehensive  
268 and cost-effective assessment of mammalian biodiversity. *Molecular Ecology*, **22**, 915-  
269 924.
- 270 Chen Y, Giles KL, Payton ME, Greenstone MH (2000) Identifying key cereal aphid predators by  
271 molecular gut analysis. *Molecular Ecology*, **9**, 1887-1898.
- 272 Churchill TB (1997) Spiders as ecological indicators: an overview for Australia. *Memoirs of the*  
273 *National Museum of Victoria*, **56**, 331-337.
- 274 Churchill TB, Arthur JM (1999) Measuring spider richness: effects of different sampling and  
275 spatial and temporal scales. *Journal of Insect Conservation*, **3**, 287-295.

- 276 Clausen HIS (1986) The use of spiders (Araneae) as ecological indicators. *Bulletin of the British*  
277 *Arachnological Society*, **7**, 83-86.
- 278 Cooper SJB, Harvey MS, Saint KM, Main BY (2011) Deep phylogeographic structuring of  
279 populations of the trapdoor spider *Moggridgea tingle* (Migidae) from southwestern  
280 Australia: Evidence for long-term refugia within refugia. *Molecular Ecology*, **20**, 3219-  
281 3236.
- 282 Eggs B, Sanders D (2013) Herbivory in Spiders: The Importance of Pollen for Orb-Weavers.  
283 *PLoS ONE*, **8**, e82637.
- 284 Feinstein J (2004) DNA sequence from butterfly frass and exuviae. *Conservation Genetics*, **5**,  
285 103-104.
- 286 Fetzner JW (1999) Extracting high-quality DNA from shed reptile skins: a simplified method.  
287 *Biotechniques*, **26**, 1052-1054.
- 288 Garb JE, González A, Gillespie RG (2004) The black widow spider genus *Latrodectus* (Araneae:  
289 Theridiidae): phylogeny, biogeography, and invasion history. *Molecular Phylogenetics*  
290 *and Evolution*, **31**, 1127-1142.
- 291 Garipey TD, Lindsay R, Ogden N, Gregory TR (2012) Identifying the last supper: utility of the  
292 DNA barcode library for bloodmeal identification in ticks. *Molecular Ecology Resources*,  
293 **12**, 646-652.
- 294 Gollan JR, Smith HM, Bulbert M, Donnelly AP, Wilkie L (2010) Using spider web types as a  
295 substitute for assessing web-building spider biodiversity and the success of habitat  
296 restoration. *Biodiversity Conservation*, **19**, 3141-3155.
- 297 Green J (1999) Sampling method and time determines composition of spider collections. *Journal*  
298 *of Arachnology*, **24**, 111-128.

- 299 Hebert PDN, Cywinska A, Ball SL, deWaard JR (2003) Biological identifications through DNA  
300 barcodes. *Proceedings of the Royal Society B*, **270**, 313-322.
- 301 Hopkins GW, Freckleton RP (2002) Declines in the numbers of amateur and professional  
302 taxonomists: implications for conservation. *Animal Conservation*, **5**, 245-249.
- 303 Hoy MA (1994) *Insect Molecular Genetics: An Introduction to Principles and Applications*.  
304 Academic Press, San Diego, California.
- 305 Huber BA (2004) The significance of copulatory structures in spider systematics. In: *Biosemiotik.*  
306 *Praktische Anwendung und Konsequenzen für die Einzelwissenschaften* (eds Schult J), pp.  
307 89–100. VWB-Verlag, Berlin, Germany.
- 308 Huber BA and Gonzalez AP (2001) Female genital dimorphism in a spider (Araneae: Pholcidae).  
309 *Journal of Zoology*, **255**, 301-304.
- 310 Jinbo U, Kato T, Ito M (2011) Current progress in DNA barcoding and future implications for  
311 entomology. *Entomological Science*, **14**, 107-124.
- 312 Kremen C, Colwell RK, Erwin TL, Murphy DD, Noss RF, Sanjayan MA (1993) Terrestrial  
313 arthropod assemblages: their use in conservation planning. *Conservation Biology*, **7**, 796-  
314 808.
- 315 Lewitus V (1935) The black widow. *American Journal of Nursing*, **35**, 751-754.
- 316 Merrett P, Snazell R (1983) A comparison of pitfall trapping and vacuum sampling for assessing  
317 spider faunas on heathland at Ashdown Forest southeast England. *Bulletin of the British*  
318 *Arachnological Society*, **6**, 1-13.
- 319 Moulder BC, Reichle DE (1972) Significance of spider predation in the energy dynamics of  
320 forest floor arthropods communities. *Ecological Monographs*, **42**, 473-498.

- 321 Nielsen ES, Laurence AM (2000) Global diversity of insects: the problems of estimating numbers.  
322 In: Nature and human society: The quest for a sustainable world. National Academy Press,  
323 Washington DC. pp. 213-222.
- 324 Pearce JL, Venier LA (2006) The use of ground beetles (Coleoptera: Carabidae) and spiders  
325 (Araneae) as bioindicators of sustainable forest management: A review. *Ecological*  
326 *Indicators*, **6**, 780-793.
- 327 Petersen SD, Mason T, Akber S, West R, White B, Wilson P (2006) Species identification of  
328 tarantulas using exuviae for international wildlife law enforcement. *Conservation*  
329 *Genetics*, **8**, 497-502.
- 330 Platnick NI (2013) The world spider catalog, version 14.5. American Museum of Natural History,  
331 online at <http://research.amnh.org/iz/spiders/catalog/COUNTS.html>.
- 332 Riecken U (1999) Effects of short-term sampling on ecological characterization and evaluation of  
333 epigeic spider communities and their habitats for site assessment studies. *Journal of*  
334 *Arachnology*, **27**, 189-195.
- 335 Robinson EA, Blagoev GA, Hebert PDN, Adamowicz SJ (2009) Prospects for using DNA  
336 barcoding to identify spiders in species-rich genera. *ZooKeys*, **16**, 27-46.
- 337 Rosenberg DM, Danks HV, Lehmkuhl DM (1986) Importance of insects in environmental impact  
338 assessment. *Environmental Management*, **10**, 773-783.
- 339 Salomon M (2011) The natural diet of a polyphagous predator, *Latrodectus hesperus* (Araneae:  
340 Theridiidae), over one year. *Journal of Arachnology*, **39**, 154-160.
- 341 Samu F, Matthews GA, Lake D, Vollrath F (1992) Spider webs are efficient collectors of  
342 agrochemical spray. *Pesticide Science*, **36**, 47-51.

- 343 Schnell IB, Thomsen PF, Wilkinson N, Rasmussen M, Jensen LRD, Willerslev E, Bertelsen MF,  
344 Gilbert MT (2012) Screening mammal biodiversity using DNA from leeches. *Current*  
345 *Biology*, **22**, 262-263.
- 346 Sheppard SK, Bell J, Sunderland KD, Fenlon J, Skervin D, Symondson WOC (2005) Detection  
347 of secondary predation by PCR analyses of the gut contents of invertebrate generalist  
348 predators. *Molecular Ecology*, **14**, 4461-4468.
- 349 Shokralla S, Spall JL, Gibson JF, Hajibabaei M (2012) Next-generation sequencing technologies  
350 for environmental DNA research. *Molecular Ecology*, **21**, 1794-1805.
- 351 Sirvid PJ, Vink CJ, Wakelin MD, Fitzgerald BM, Hitchmough RA, Stringer IAN (2012) The  
352 conservation status of New Zealand Araneae. *New Zealand Entomologist*, **35**, 85-90.
- 353 Sunderland KD, Fraser AM, Dixon AFG (1986) Field and laboratory studies on money spiders  
354 (Linyphiidae) as predators of cereal aphids. *Journal of Applied Ecology*, **23**, 433-447.
- 355 Townzen JS, Brower AVZ, Judd DD (2008) Identification of mosquito bloodmeals using  
356 mitochondrial cytochrome oxidase subunit I and cytochrome b gene sequences. *Medical*  
357 *and Veterinary Entomology*, **22**, 386-393.
- 358 Turner CR, Barnes MA, Xu CCY, Jones SE, Jerde CL, Lodge DM (2014) Particle size  
359 distribution and optimal capture of aqueous microbial eDNA. *Methods in Ecology and*  
360 *Evolution*, **5**, 676-684.
- 361 Vetter RS, Vincent LS, Danielsen DWR, Reinker KI, Clarke DE, Itnyre AA, Kabashima JN, Rust  
362 MK (2012) The prevalence of brown widow and black widow spiders (Araneae:  
363 Theridiidae) in Urban Southern California. *Journal of Medical Entomology*, **49**, 947-951.



364 Vink CJ, Derraik JGB, Phillips CB, Sirvid PJ (2011) The invasive Australian redback spider,  
365 *Latrodectus hasseltii* Thorell 1870 (Araneae: Theridiidae): current and potential  
366 distributions, and likely impacts. *Biological Invasions*, **13**, 1003-1019.

367 Zevenbergen JM, Schneider NK, Blackledge TA (2008) Fine dining or fortress? Functional shifts  
368 in spider web architecture by the western black widow *Latrodectus hesperus*. *Animal*  
369 *Behavior*, **76**, 823–829.

370

### 371 **Data Accessibility**

372 All DNA sequences generated in this study are provided in Table S1 (Supplementary Data) and  
373 will be archived in NCBI Genbank before publication of this manuscript.

374

375 **Table 1.** PCR primers designed to amplify the DNA barcoding region of the cytochrome oxidase  
376 subunit I gene of target species. All *Latrodectus* spp. primer sets are nested and use the same  
377 forward primer.

| Primer name | Sequence (5'-3')           | Size (bp) | Amplicon (bp) | Target taxon            |
|-------------|----------------------------|-----------|---------------|-------------------------|
| Lat_COI_F1  | GAATTAGGGCAACCGGGAAG       | 20        | -             | <i>Latrodectus</i> spp. |
| Lat_COI_R1  | AGGAACTAATCAATTTCCAAACCCC  | 25        | 135           | <i>Latrodectus</i> spp. |
| Lat_COI_R2  | CCAGCTCCAACCCCAACC         | 18        | 257           | <i>Latrodectus</i> spp. |
| Lat_COI_R3  | ACAGAACTTCCTCTATGTCCTTCCAA | 26        | 311           | <i>Latrodectus</i> spp. |
| Lat_COI_R4  | GCCCCTGCTAATACAGGTAAT      | 21        | 497           | <i>Latrodectus</i> spp. |
| Adom_F      | TGGTGGATTCGGAAATTGAT       | 20        | -             | <i>A. domesticus</i>    |
| Adom_R      | CCCGCAAGAACAGGTAAAGA       | 25        | 248           | <i>A. domesticus</i>    |

378

379

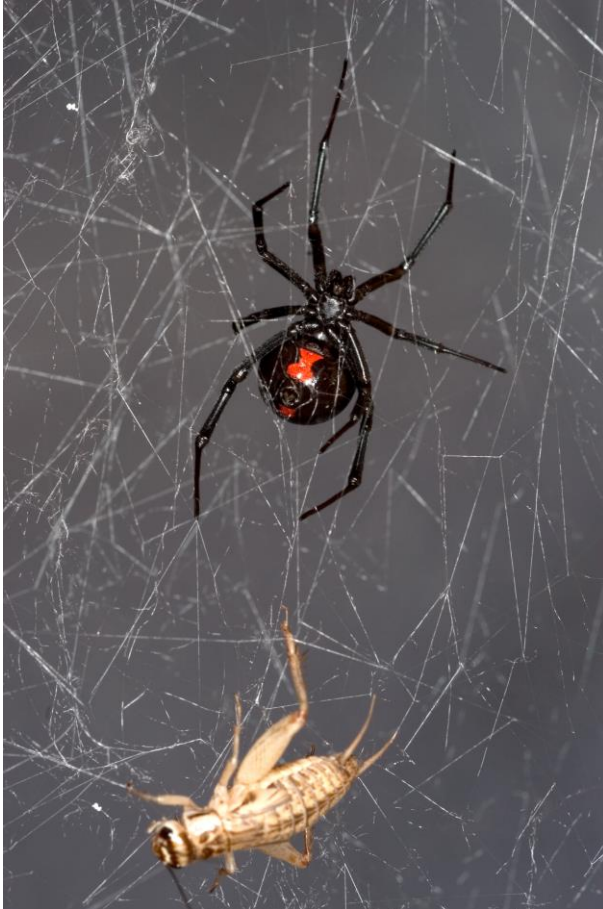

380

381 **Figure 1.** Southern black widow spider (*Latrodectus mactans*) with its prey house cricket (*Acheta*  
382 *domesticus*) trapped in spider web.

383

384

385

386

387

388

389

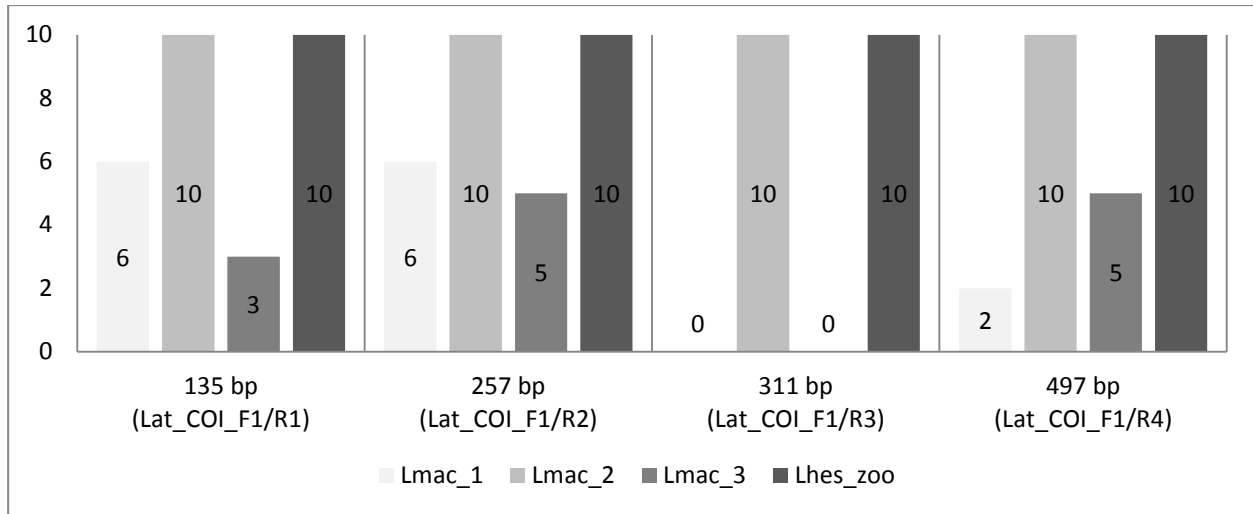

390

391 **Figure 2.** Success in detecting the mtDNA cytochrome c oxidase subunit I (COI) locus of  
392 *Latrodectus* spp. from web samples as measured by the number of positive PCR results out of 10  
393 replicates. Samples “Lmac\_1”, “Lmac\_2”, and “Lmac\_3” were tested for *Latrodectus mactans*  
394 while “Lhes\_zoo” was tested for *Latrodectus hesperus* using the same nested “Lat\_COI” primer  
395 sets.
